# Supplementary material
Source: publisher site journal article supplement (https://www.dovepress.com/article/215736)
Supplement: Supplementary file 1 [file get_supplementary_file.php]

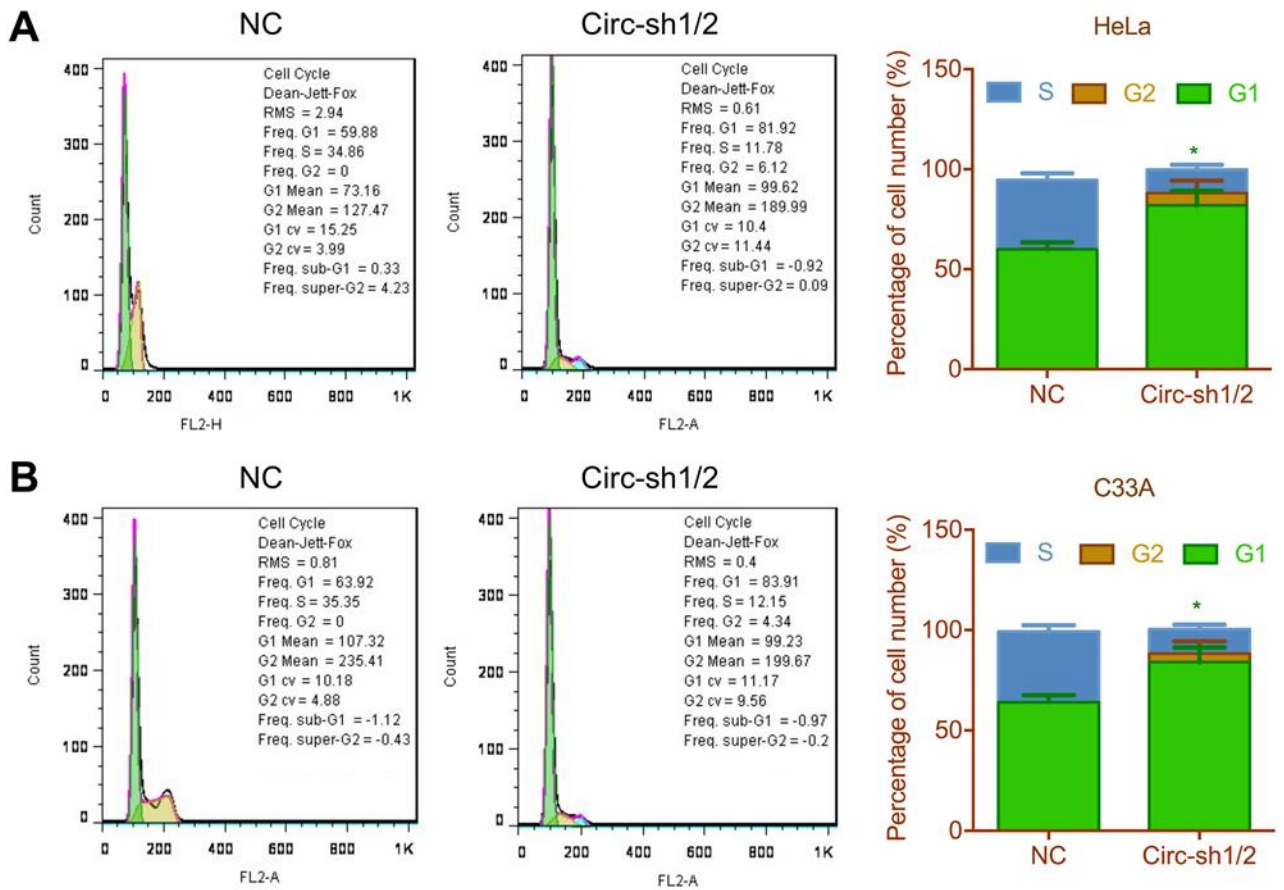

Figure S1. Knockdown of circ\_103973 accelerated cell cycle arrest of HeLa and C33A cells. HeLa and C33A cells were transfected with NC and circ\_103973 siRNAs, respectively. Cell cycle distribution was examined by Flow cytometry in HeLa (A) and C33A (B) cells. \*P < 0.05.
